# Supplementary material
Source: publisher site journal article supplement (https://www.dovepress.com/article/460339)
Supplement: Supplementary file 1 [file get_supplementary_file.php]

ORIGINAL RESEARCH

Min Liu et al

# High strength and shape memory spinal fusion device for minimally invasive interbody fusions

Sub ID: 460339

Degradation experiment: Thirty-five LSMPC-0.5 tablets of close mass were weighed and individually immersed in 10 mL of FBS solution (1.5×), which was changed every two days. Five of the tablets were taken each day, dried and weighed to calculate the percentage of remaining mass.


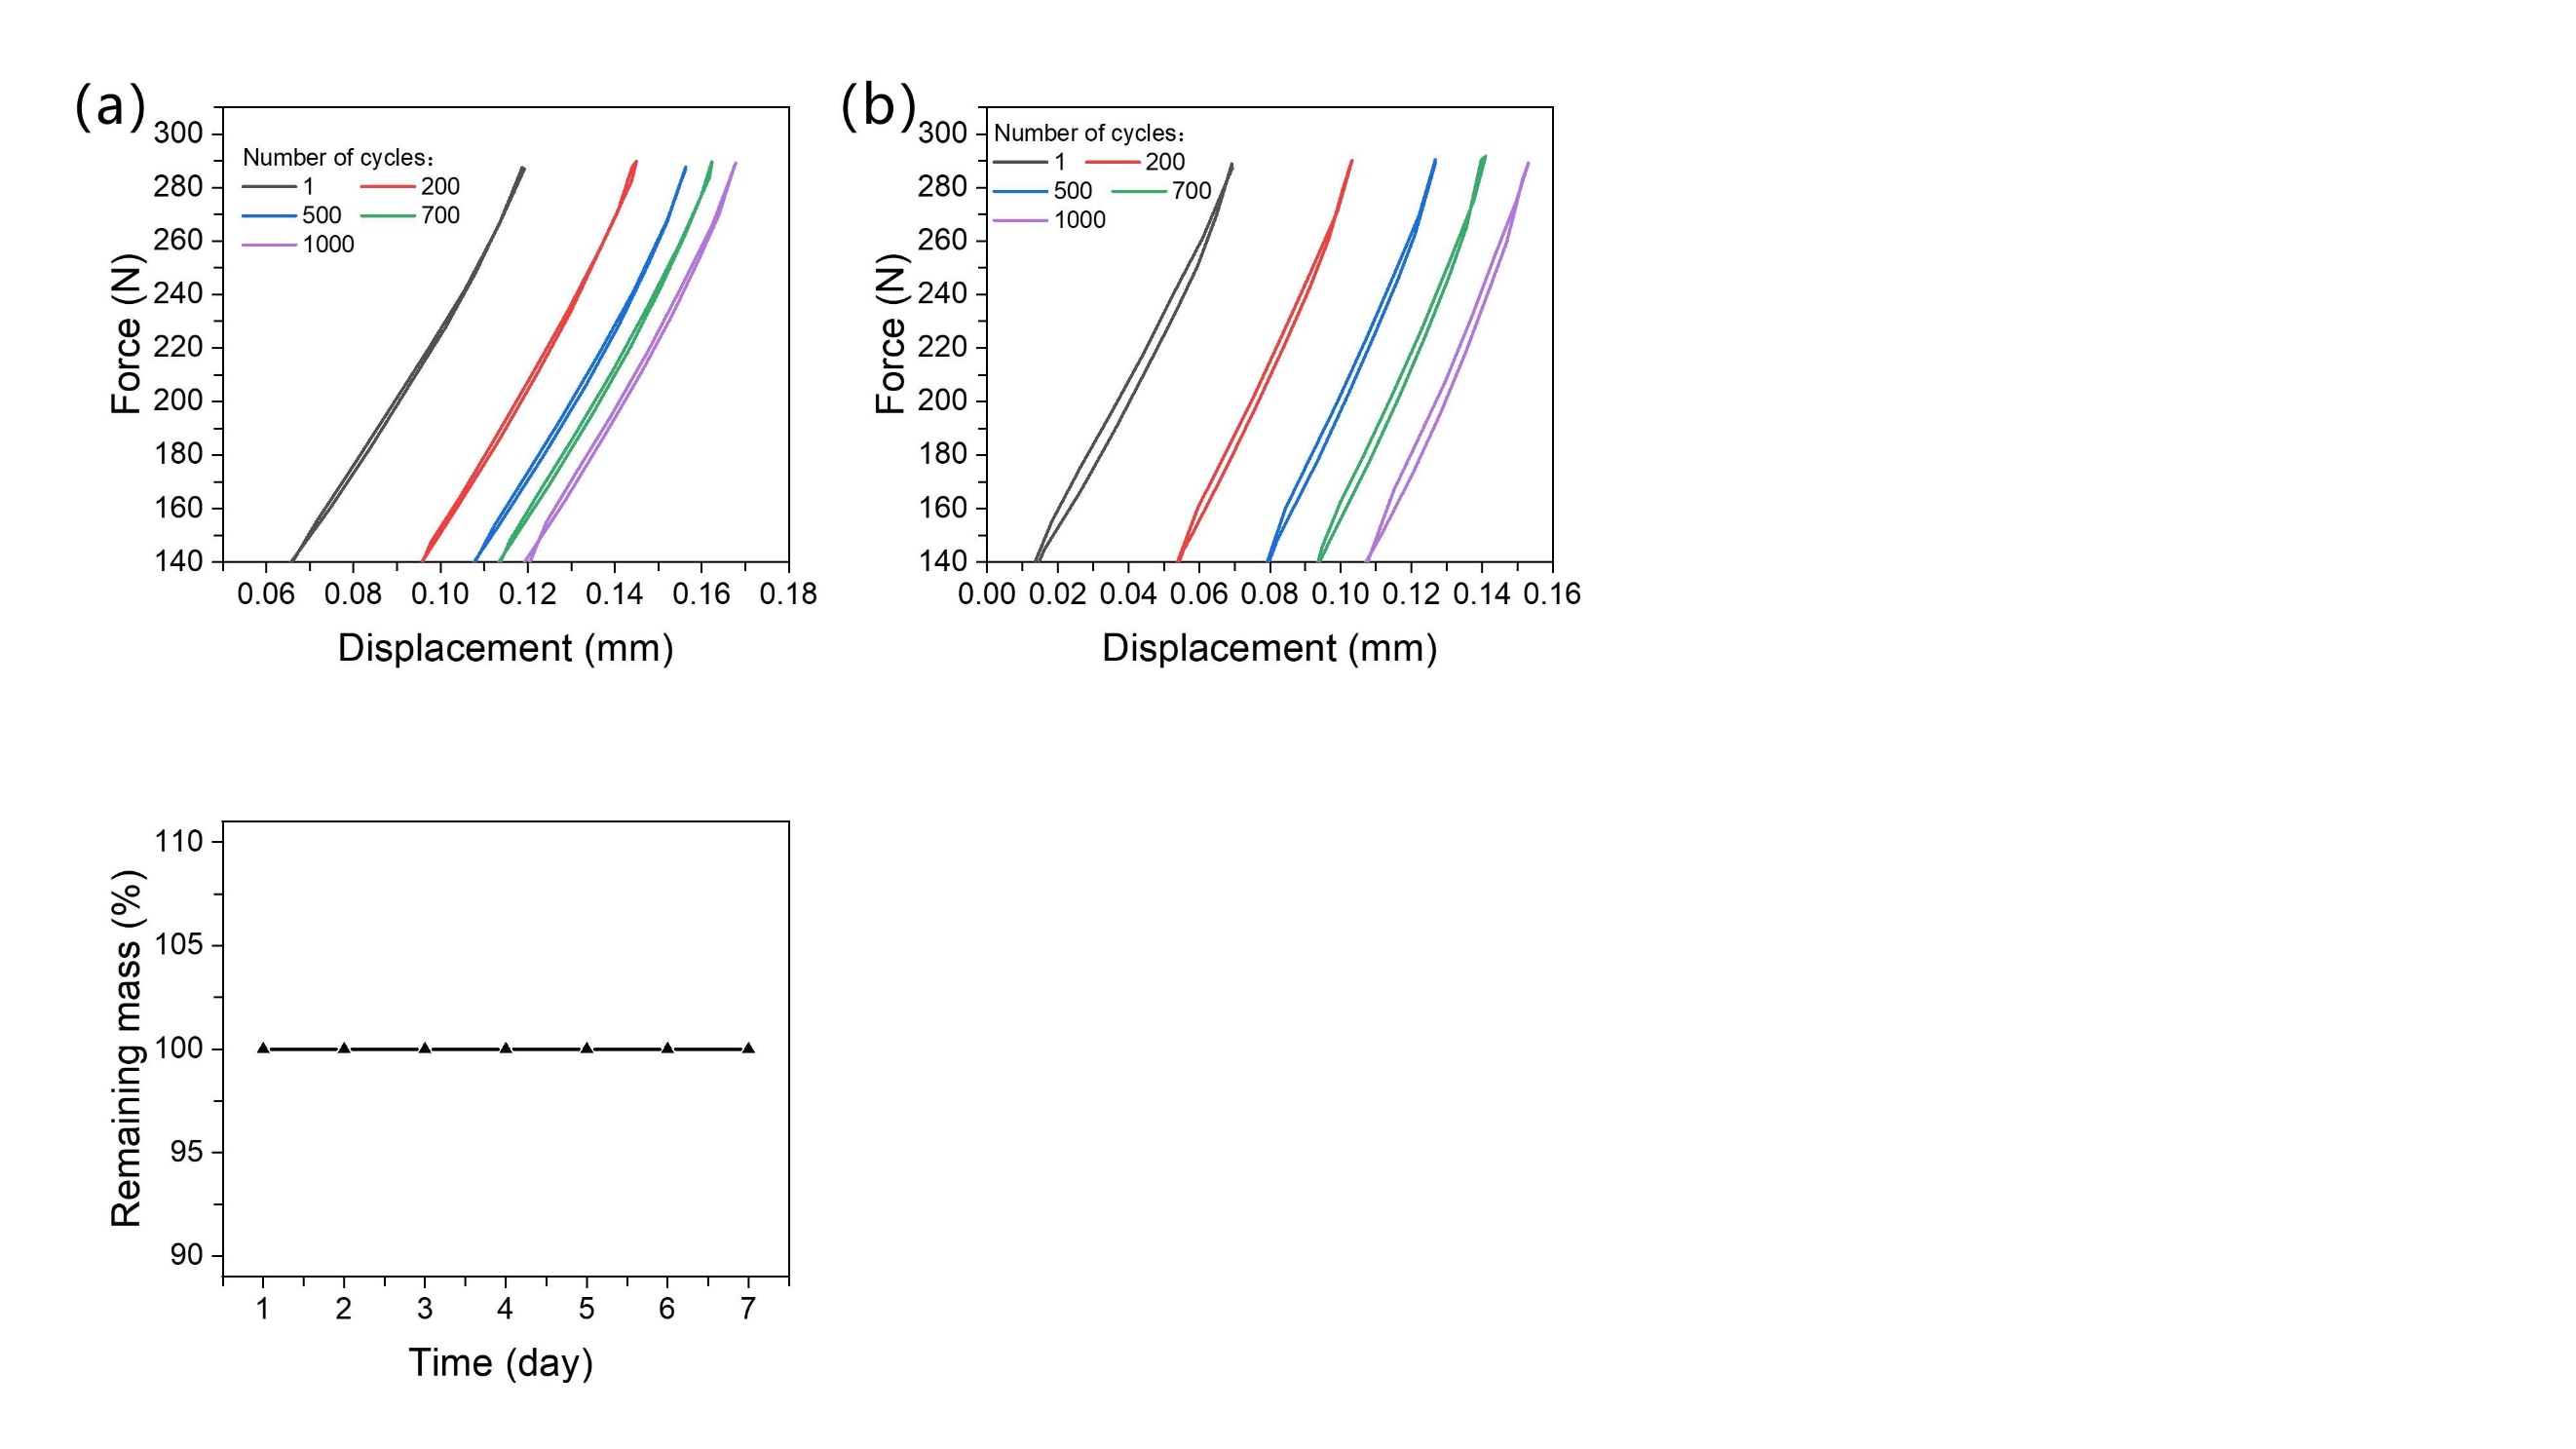


Supplementary Figure 1 Degradation experiment of SMPC-0.5 in 7 days.
